# Supplementary material
Source: bioRxiv or medRxiv preprint supplement (http://medrxiv.org/highwire/filestream/83248/field_highwire_adjunct_files/2/2020.05.27.20114363-3.pdf)
Supplement: Supplementary file [file 2020.05.27.20114363-3.pdf]

**Additional file 2: Table S1: Laboratory findings on the day of admission**

| <b>ID</b> | <b>WBC<br/>(*10<sup>3</sup>/mm<sup>3</sup>)</b> | <b>Lymphocytes<br/>(*10<sup>3</sup>/mm<sup>3</sup>)</b> | <b>Hb<br/>(g/dL)</b> | <b>Plt<br/>(*10<sup>3</sup>/mm<sup>3</sup>)</b> | <b>CRP<br/>(mg/L)</b> | <b>DD<br/>(ng/mL)</b> | <b>LDH<br/>(IU/L)</b> | <b>Troponin T hs<br/>(ng/L)</b> |
|-----------|-------------------------------------------------|---------------------------------------------------------|----------------------|-------------------------------------------------|-----------------------|-----------------------|-----------------------|---------------------------------|
| <b>1</b>  | 8.58                                            | 0.43                                                    | 12.3                 | 174                                             | 10                    | NA                    | 165                   | 19                              |
| <b>2</b>  | 14.39                                           | 0.66                                                    | 9.9                  | 424                                             | 270                   | NA                    | 1188                  | 140                             |
| <b>3</b>  | 9.69                                            | 0.51                                                    | 15.5                 | 179                                             | 72                    | NA                    | 840                   | 32                              |
| <b>4</b>  | 7.93                                            | 1.20                                                    | 11.7                 | 465                                             | 86                    | 1838                  | 358                   | 95                              |
| <b>5</b>  | 6.52                                            | 0.82                                                    | 14.3                 | 200                                             | 180                   | NA                    | 393                   | 11                              |
| <b>6</b>  | 6.94                                            | NA                                                      | 16.4                 | 116                                             | 37                    | 1066                  | 521                   | 39                              |
| <b>7</b>  | 9.65                                            | 2.11                                                    | 11.8                 | 194                                             | 270                   | NA                    | 641                   | 46                              |
| <b>8</b>  | 12.2                                            | 0.48                                                    | 8.9                  | 106                                             | 86                    | NA                    | 259                   | 235                             |
| <b>9</b>  | 8.69                                            | 0.70                                                    | 11.4                 | 200                                             | 170                   | NA                    | 563                   | 20                              |
| <b>10</b> | 13.40                                           | 0.97                                                    | 13.1                 | 258                                             | 270                   | 1789                  | 802                   | 26                              |
| <b>11</b> | 5.28                                            | 0.59                                                    | 11.4                 | 131                                             | 150                   | 1849                  | 658                   | 19                              |
| <b>12</b> | 25.48                                           | 1.72                                                    | 14.8                 | 378                                             | 240                   | NA                    | 1138                  | 93                              |

|           |      |      |      |     |     |      |     |    |
|-----------|------|------|------|-----|-----|------|-----|----|
| <b>13</b> | 8.90 | 1.12 | 19.0 | 190 | 110 | 8531 | 640 | 46 |
| <b>14</b> | 4.67 | 0.62 | 13.5 | 142 | 27  | NA   | 238 | 12 |
| <b>15</b> | 9.12 | 0.66 | 11.1 | 271 | 78  | 899  | 576 | 39 |
| <b>16</b> | 3.12 | 0.52 | 9.9  | 210 | 76  | 1319 | 319 | 24 |
| <b>17</b> | 7.02 | 0.83 | 9.1  | 220 | 130 | 2744 | 330 | 85 |

WBC: white blood cell count; Hb: hemoglobin concentration; Plt: Platelet count; CRP: C-reactive protein; DD: D-dimer; NA: not available;

LDH: lactate dehydrogenase; hs: high sensitivity

The following pathogens were isolated during hospital/ICU stay: patient 5: *Proteus mirabilis*, *Enterobacter cloacae* (BAL); patient 6: *Klebsiella oxytoca* and *Aspergillus fumigatus* (BAL); patient 8: *Staphylococcus aureus* and *Bacteroides thetaiotaomicron* (blood culture); patient 9: *Enterobacter aerogenes* and *Staphylococcus aureus* (BAL); patient 12: *Enterobacter aerogenes* and *Escherichia coli* (BAL); patient 15: HSV1, candida, *Stenotrophomonas maltophilia*, *Staphylococcus aureus*, *Klebsiella oxytoca* and *Streptococcus pneumoniae* (BAL); patient 16: *Klebsiella pneumoniae*; patient 17: *Klebsiella pneumoniae* and *Streptococcus mitis* (BAL).
